# Supplementary material for: Impact of Hydrolysis on Thermal Stability and Binding Capacity of Torrefied-densified Iron (Lophira Alata) Wood Dust
Source: Research Square preprint supplement (doi:10.21203/rs.3.rs-8004993/v1), 2026-01-30
Supplement: Supplementary file 1 [file 18c464a68183ede5205cec2d.docx]

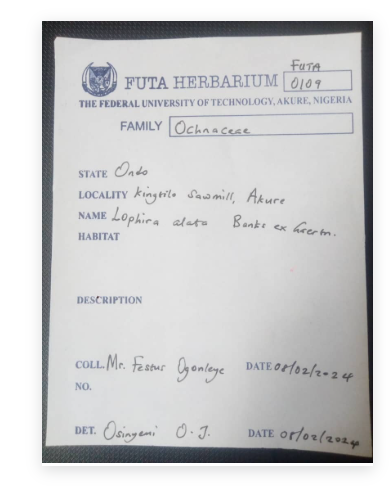


Fig. S1:Herbarium Details


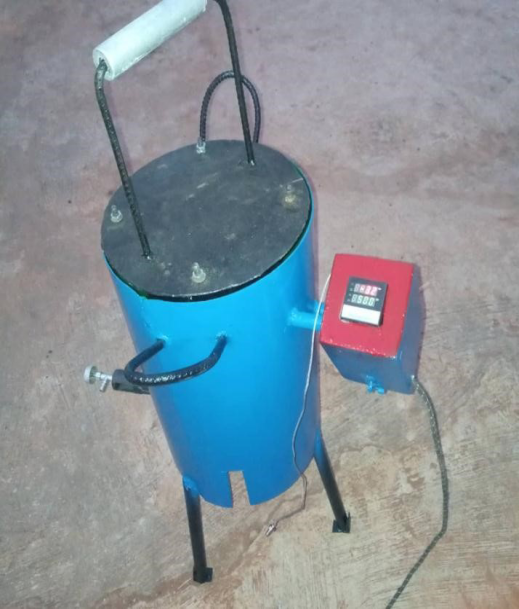

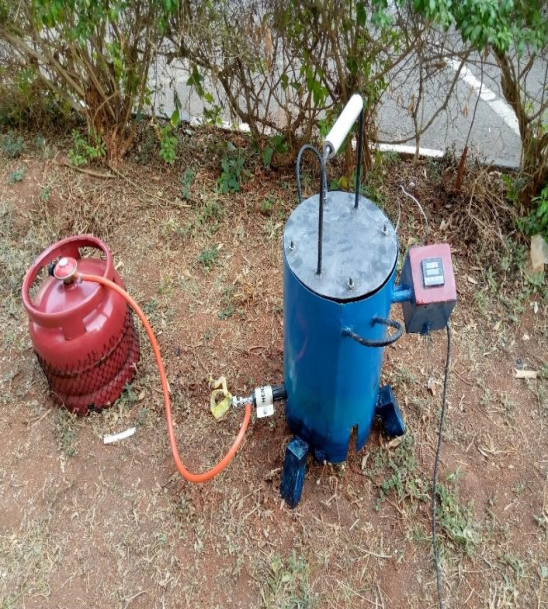


**Fig 1(a)**: Laboratory scale torrefier **Fig 1(b)**: Set-up of the lab-scale Torrefier


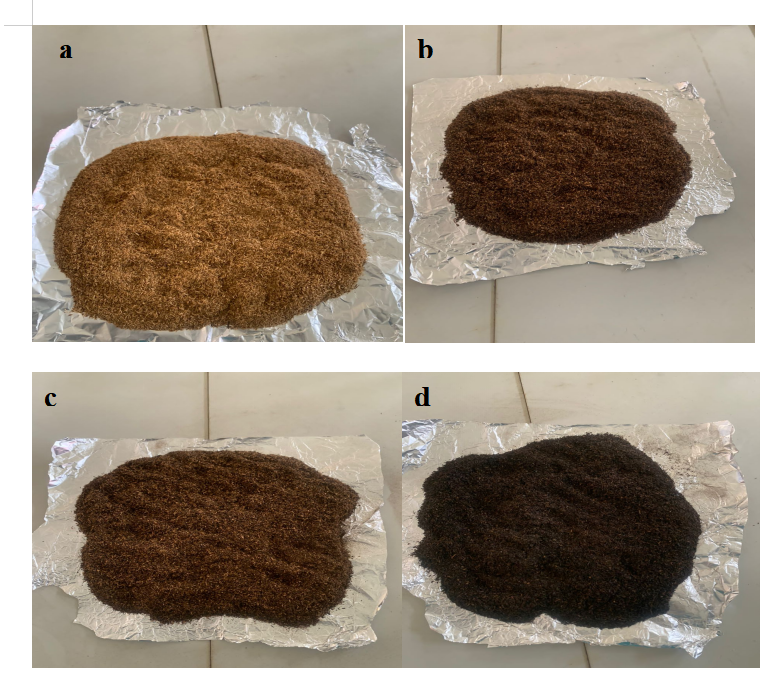


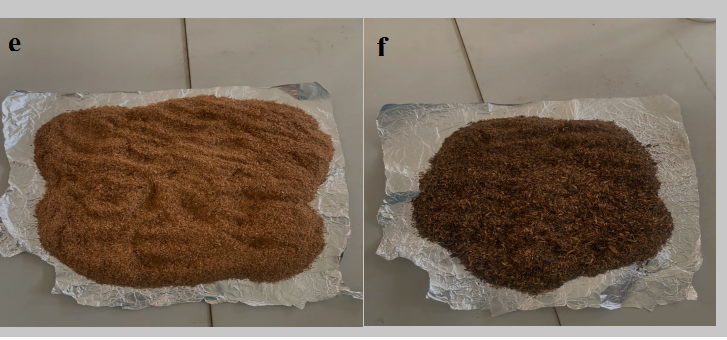


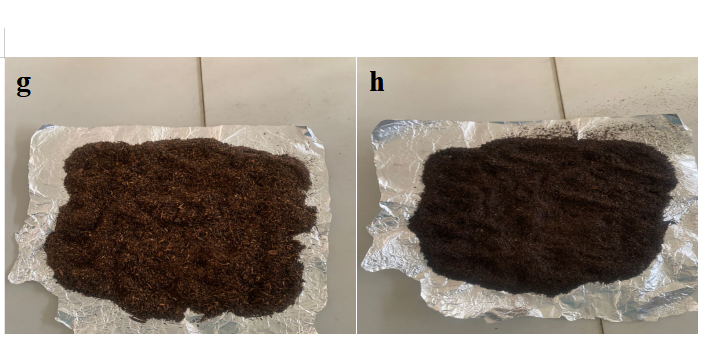


**Fig. 1.1: Pictures of: (a**) **Raw Iron Wood Dust**, (**b**) **Torrefied Iron Wood Dust at 200 ℃,** (**c**) **Torrefied Iron Wood Dust at 250 ℃** (d) **Torrefied Iron Wood Dust at 300 ℃** (e) **Hydrolysed Iron Wood Dust(f) HydrolysedTorrefied Iron Wood Dust at 200 ℃** (g) **Hydrolysed Torrefied Iron Wood Dust at 250 ℃** (h) **Hydrolysed Torrefied Iron Wood Dust at 283 ℃.**

**Table 1:** Proximate Composition of the raw, torrecfied, hydrolyzed and hydrolyzed torrified wood dust of***Lophira alata***

| **Sample** | **Moisture (%)** | **Volatile matter (%)** | **Ash (%)** | **Fixed carbon (%)** |
| --- | --- | --- | --- | --- |
| RIWD | 13.28 | 1.57 | 1.06 | 80.09 |
| TIWD 200OC | 6.60 | 2.45 | 2.29 | 88.66 |
| TIWD 250OC | 5.77 | 7.38 | 2.89 | 83.96 |
| TIWD 300OC | 6.82 | 20.69 | 5.70 | 82.79 |
| HIWD | 15.16 | 0.44 | 0.60 | 83.80 |
| HTIWD 200OC | 7.04 | 1.93 | 0.41 | 90.62 |
| HTIWD 250OC | 4.81 | 4.79 | 0.10 | 90.30 |
| HTIWD 283 OC | 3.89 | 3.44 | 1.01 | 91.66 |

Key: RIWD means Raw Iron Wood Dust

TIWD 200 OC, 250 OC, 300 OC means Torrefied Iron Wood Dust at 200 OC, 250 OC, 300 OC

HIWD means Hydrolysed Iron Wood Dust

HTIWD 200 OC, 250 OC, 283 OC means Hydrolysed Torrefied Iron Wood Dust at 200 OC, 250 OC, 283 OC

**Table 2:** Fibre Composition of Untorrefied, Torrefied and Hydrolysed Wood Dust Sample

| **Sample** | **Hemicellulose%** | **Lignin%** | **Cellulose%** | **Extractive%** |
| --- | --- | --- | --- | --- |
| RIWD | 11.71 | 15.43 | 65.58 | 7.28 |
| RTIWD 300 OC | 7.60 | 29.73 | 60.67 | 2.07 |
| HTIWD 283 OC | 3.58 | 35.33 | 59.10 | 1.99 |

Where RIWD means Raw Iron Wood Dust

RTIWD 300 OC means Raw Torrefied Iron Wood Dust at 300 OC

HTIWD 283 OC means Hydrolysed-torrefied Iron Wood Dust at 283 OC

**Table 3**: The High Heating Value (Energy Value) of the Raw (Untorrefied), Torrefied, Hydrolysed and Hydrolysed-torrefied Wood Dust of *Lophira alata*

| **Sample** | **Energy (MJ/Kg)** |
| --- | --- |
| RIWD | 17.315 |
| TIWD 200 | 18.740 |
| TIWD 250 | 19.776 |
| TIWD 300 | 19.921 |
| HIWD | 16.390 |
| HTIWD 200 | 18.497 |
| HTIWD 250 | 19.508 |
| HTIWD 283 | 22.721 |

**Table 4:** The Effect Variation in Temperature on the Energy Value of Hydrolysed-torrefied *Lophira alata*

| **Sample** | **Energy**  **MJ/Kg** |
| --- | --- |
| HIWD | 16.390 |
| HTIWD 200 | 18.497 |
| HTIWD 250 | 19.508 |
| HTIWD 283 | 22.721 |

**Table 5:** Ultimate result of raw, torrefied, hydrolyzed and hydrolyzed-torrefied wood dust biomass

| Sample | %C | %S | %H | %N | %O H/C O/C |
| --- | --- | --- | --- | --- | --- |
| RIWD | 55.83 | 0.00 | 2.45 | 0.149 | 21.58 0.043 0.386 |
| TIWD 300OC | 75.36 | 1.36 | 0.32 | 0.380 | 4.53 0.004 0.060 |
| HIWD | 56.07 | 0.00 | 6.09 | 0.412 | 32.78 0.109 0.585 |
| HTIWD 283OC | 81.31 | 1.92 | 0.31 | 0.137 | 8.20 0.003 0.100 |

Key: Where RIWD means Raw Iron Wood Dust, TIWD 300 OC means Torrefied Iron Wood Dust at 300 OC, HIWD means Hydrolysed Iron Wood Dust, HTIWD 283 OC means Hydrolysed-torrefied Iron Wood Dust 283 OC.


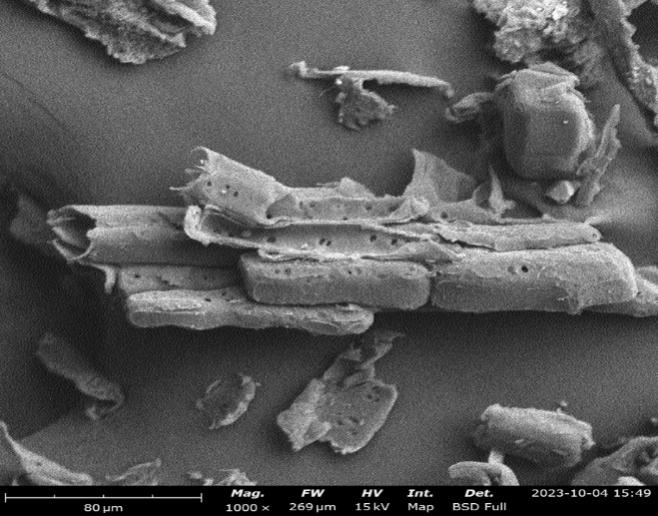

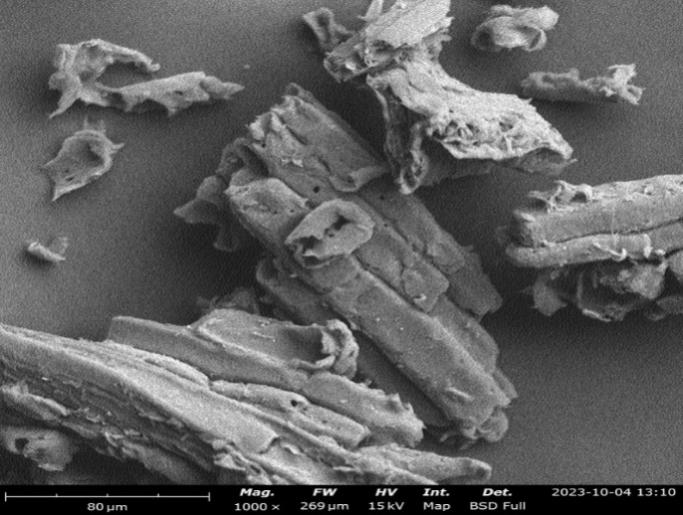


**b**

**a**


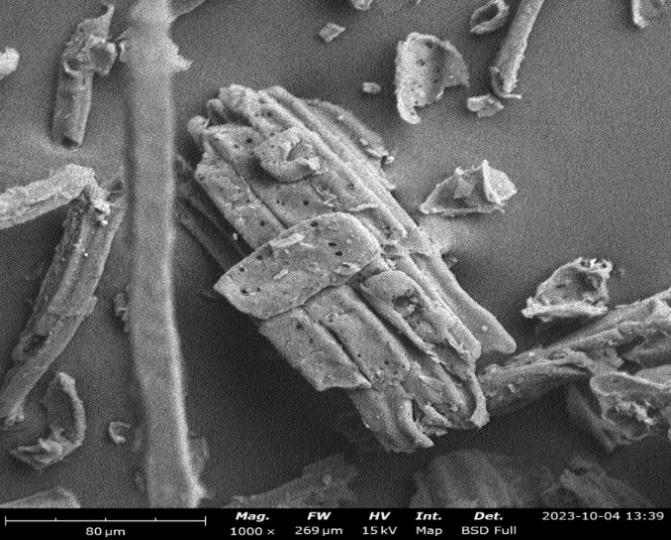

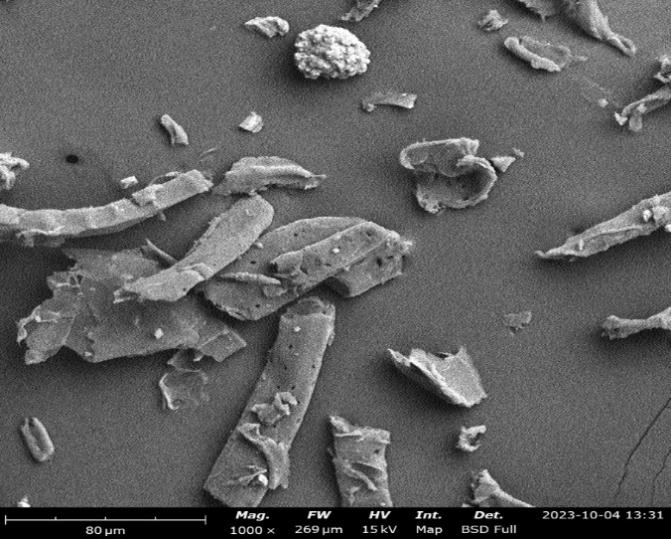


**d**

**c**


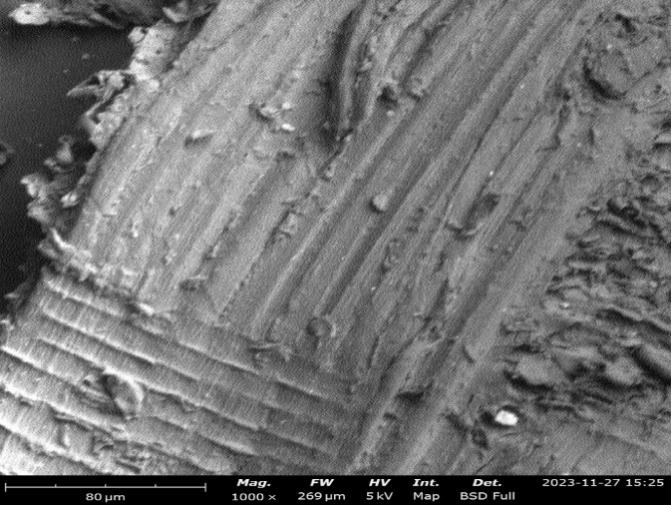


**e**

**Figure 2:** Surface morphologies of (**a**) Untorrefied Wood Dust Biomass of *Lophira alata*, (**b**) Torrefied Wood Dust Biomass at 200℃, (c) Torrefied Wood Dust Biomass at 250℃, (d) Torrefied Wood Dust Biomass at 300℃, (e) Hydrolysed-Torrefied Wood Dust Biomass at 283 ℃


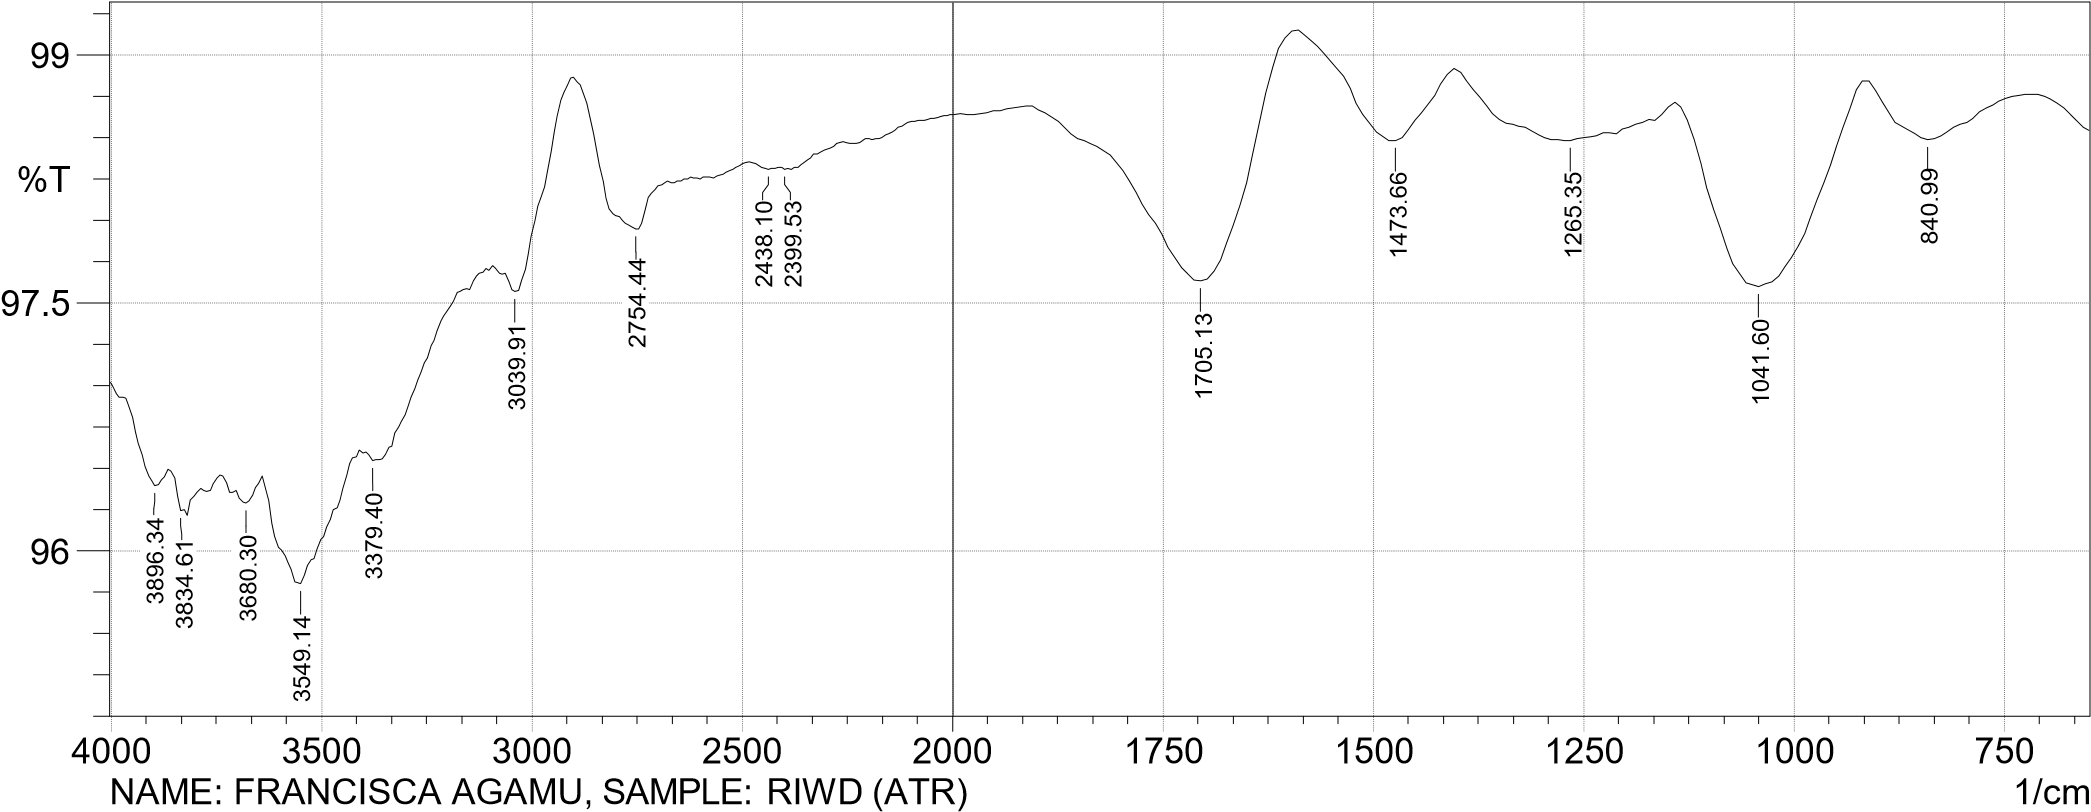


**Figure 3:** The FTIR Spectra of untorrefied (raw) wood dust sample sourced from *Lophira alata* (LA)


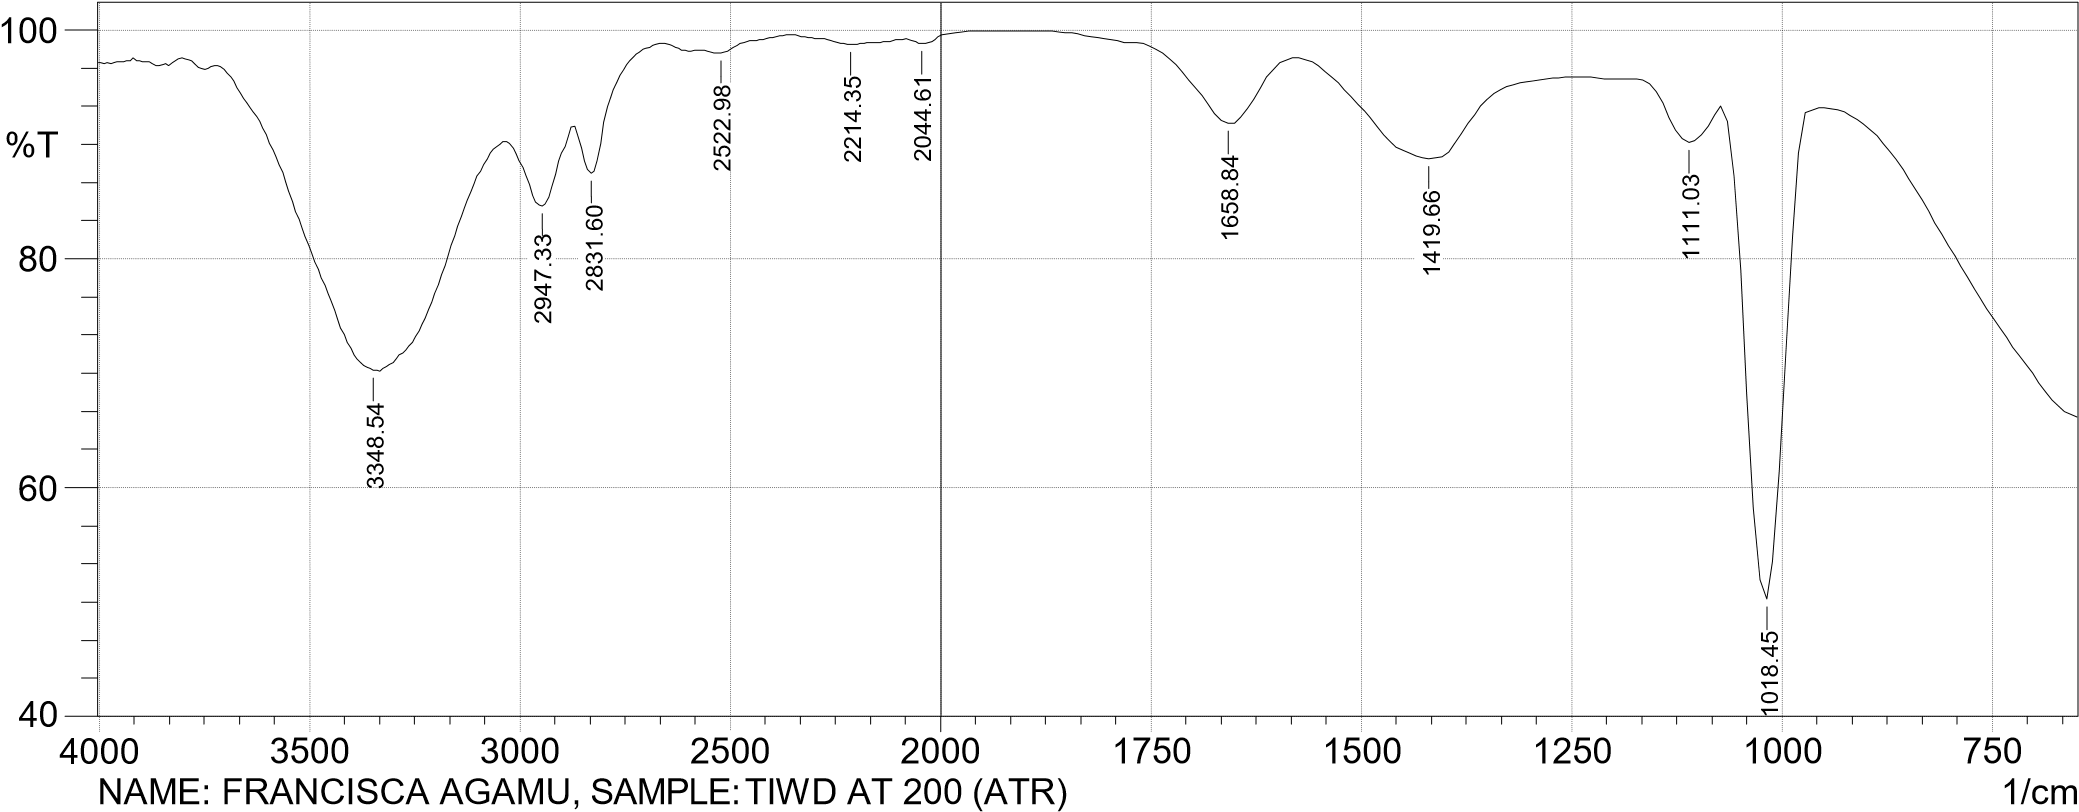


**Figure 4:** The FTIR Spectra of torrefied at 200 ℃ wood dust sample sourced from *Lophira alata* (LA)


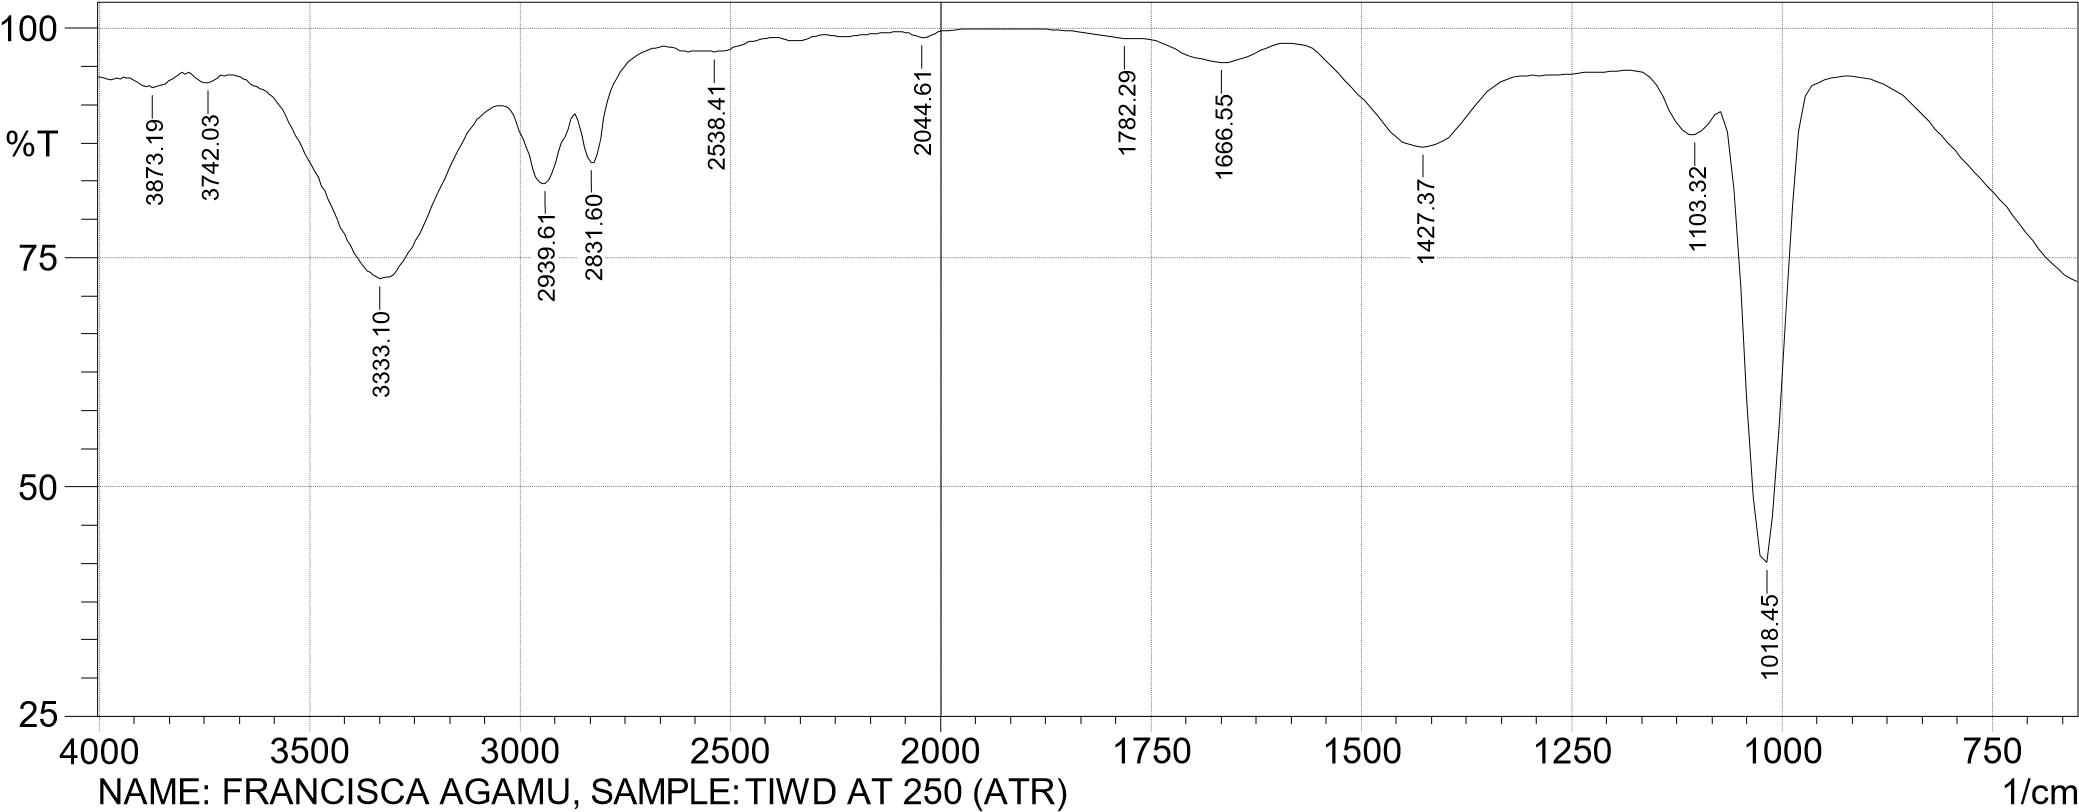


**Figure 5:** The FTIR Spectra of torrefied at 250 ℃ wood dust sample sourced from *Lophira alata* (LA)


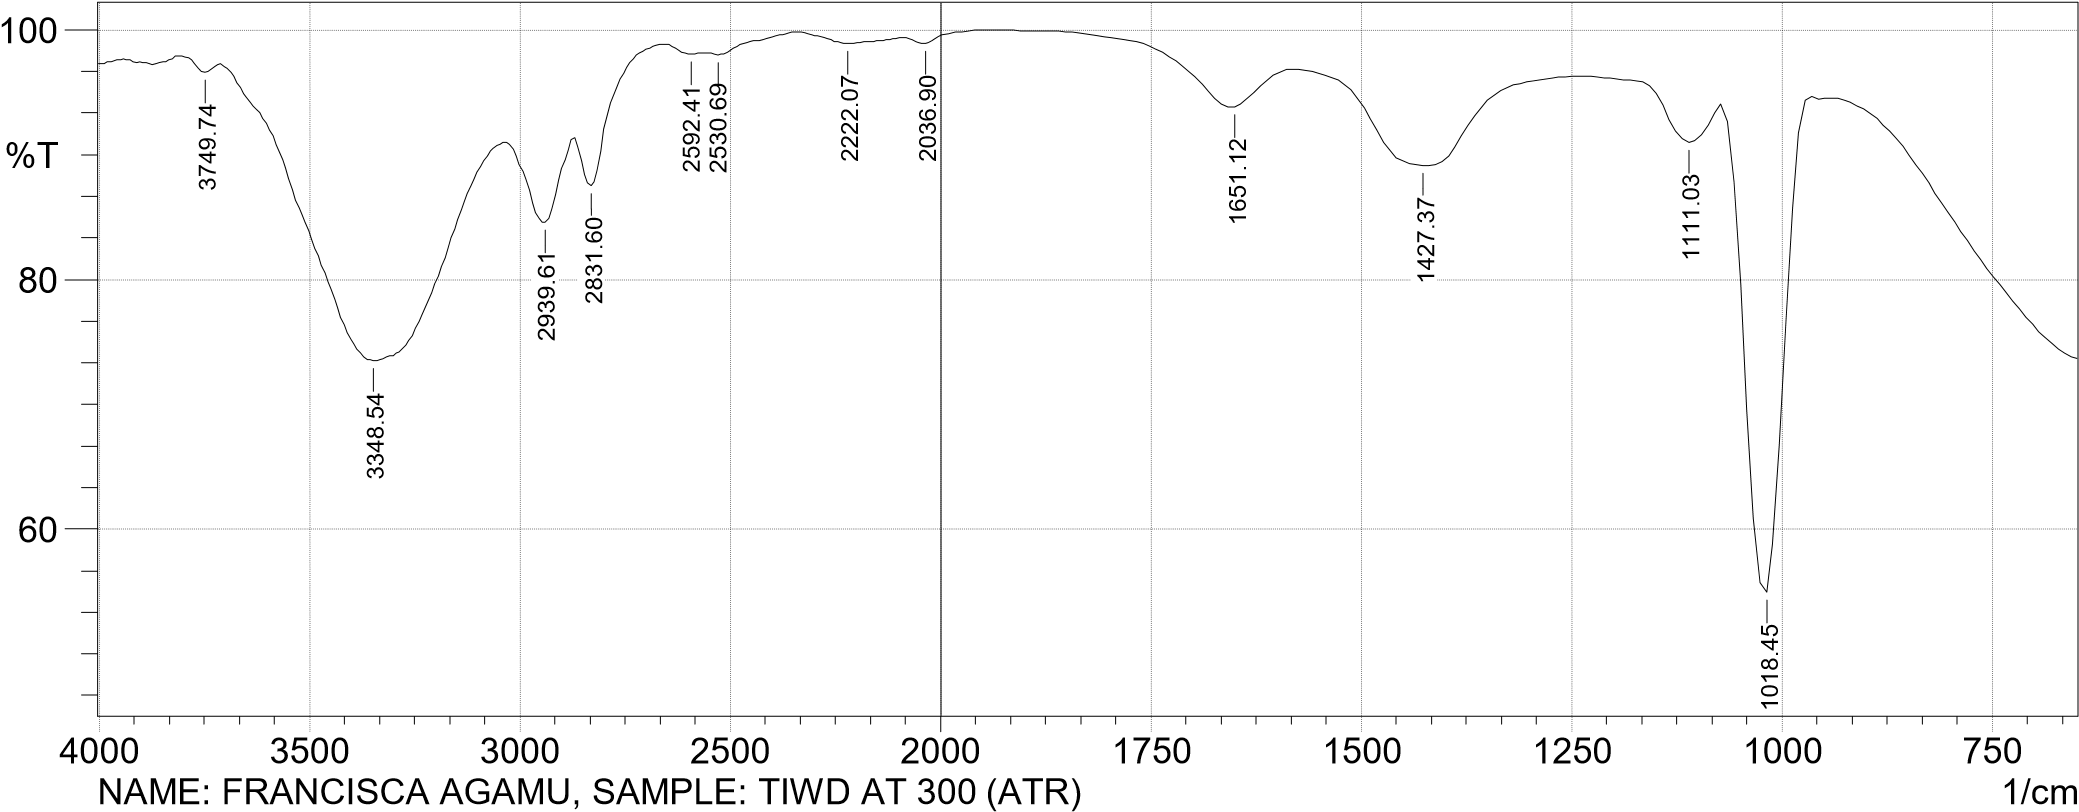


**Figure 6:** The FTIR Spectra of torrefied at 300 ℃ wood dust sample sourced from *Lophira alata* (LA)


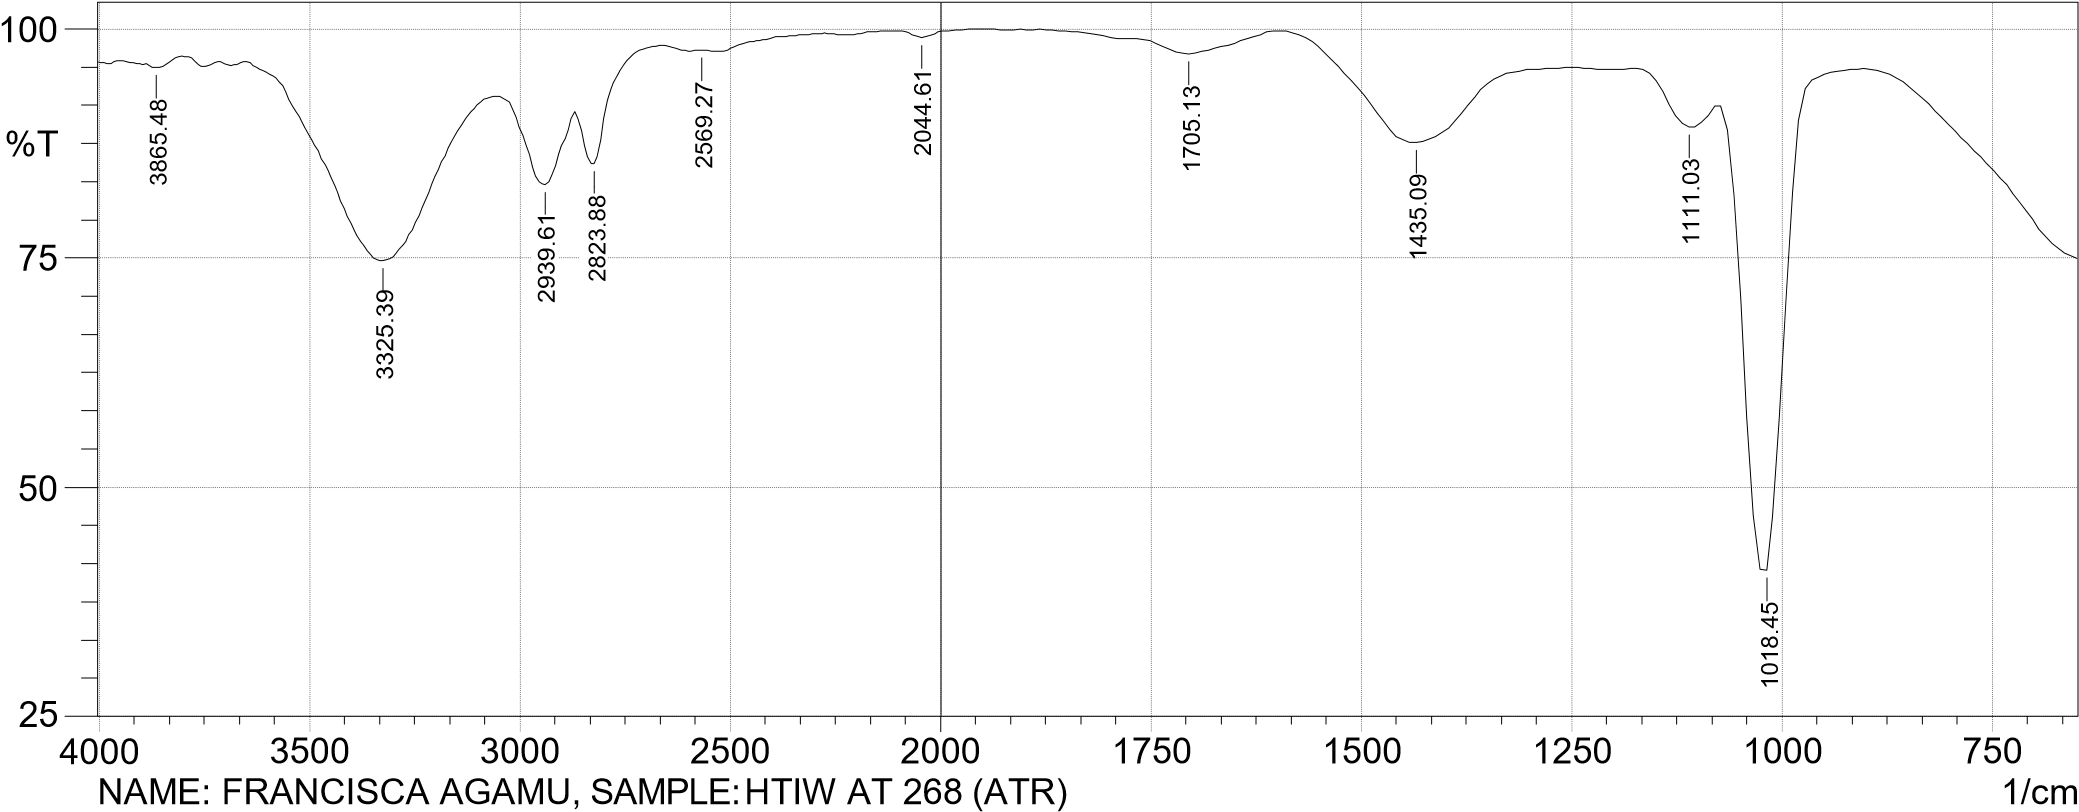


**Figure 7:** The FTIR Spectra of hydrolysed-torrefied wood dust sample sourced from *Lophira alata* (LA)


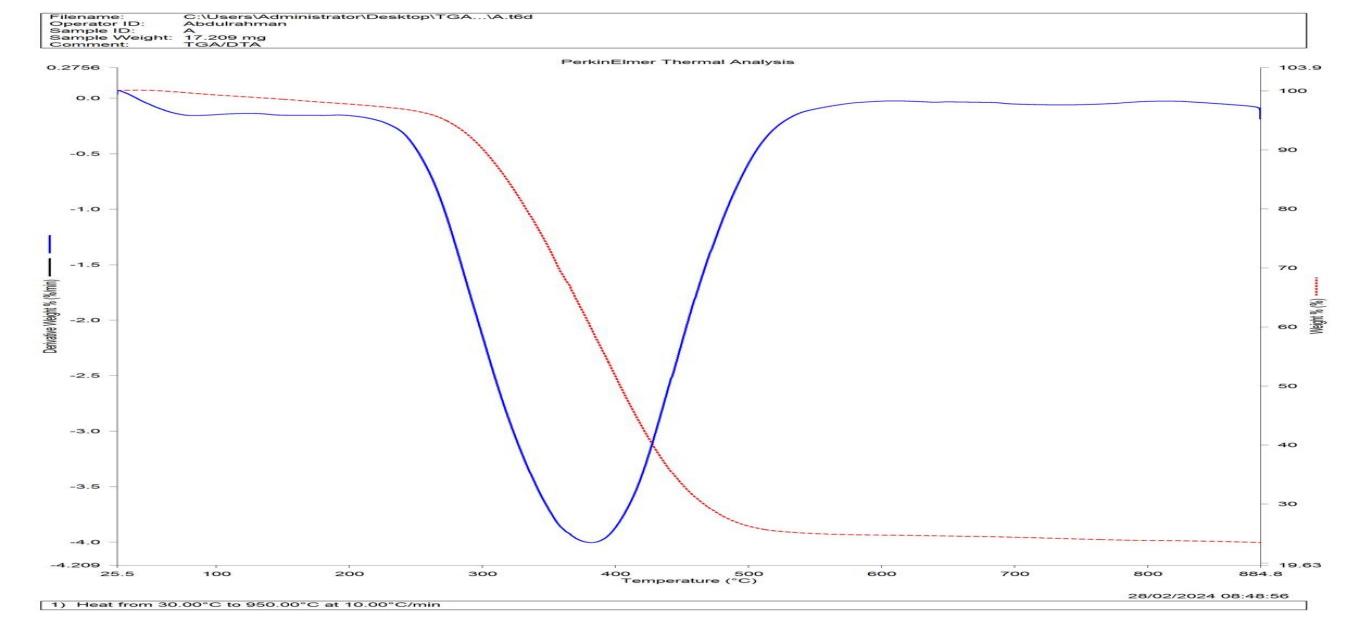


**Figure 8:** The Thermogram of Untorrefied Wood Dust Sample of Lophira alata tree


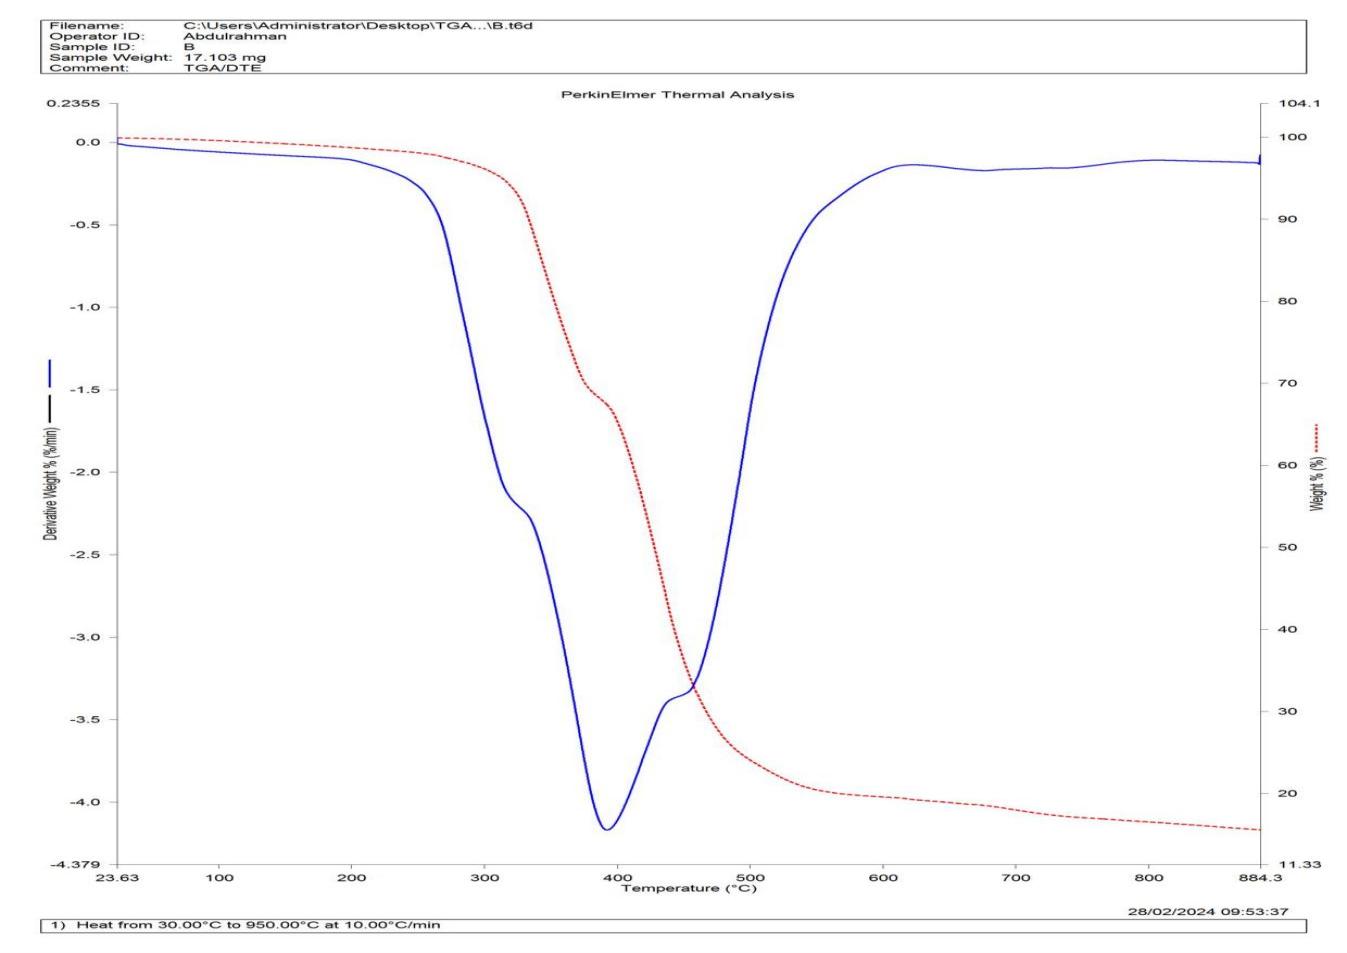


**Figure 9:** The Thermogram of Torrefied Wood Dust Sample at 300 ℃ of Lophira alata tree


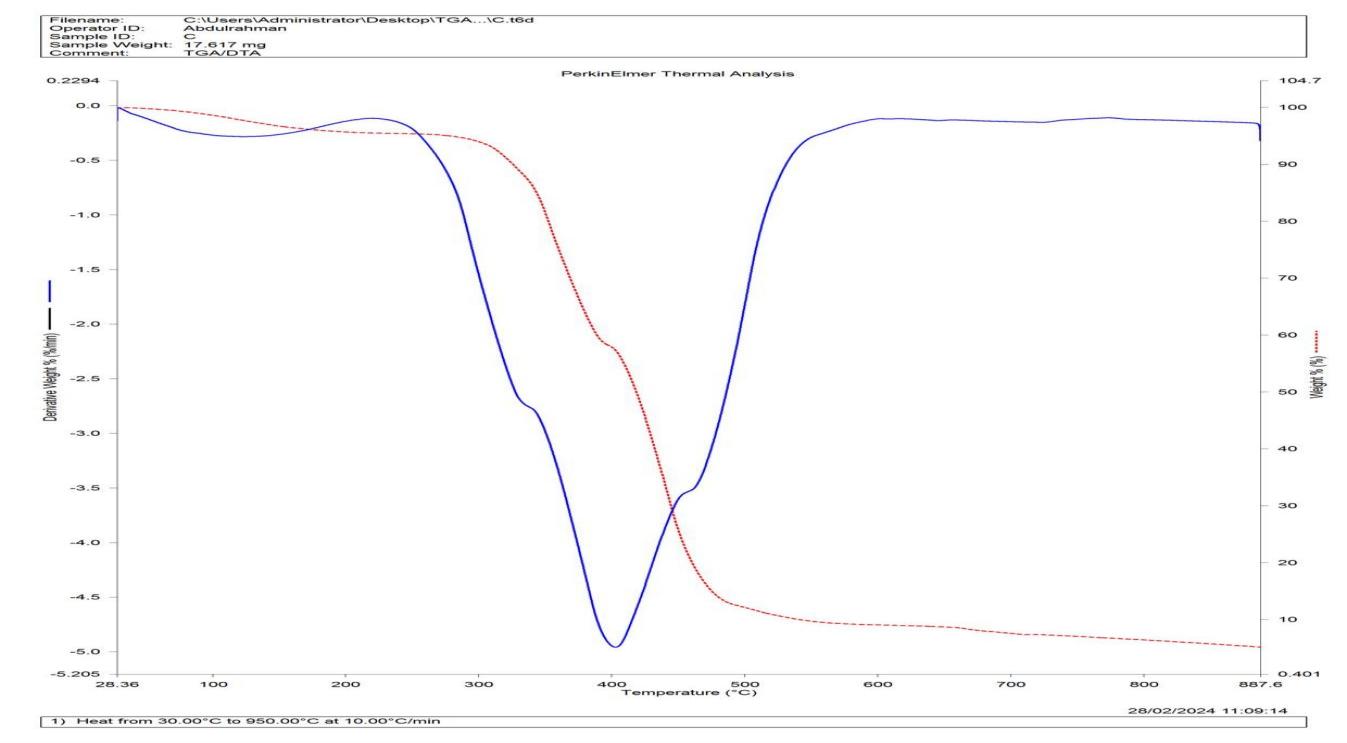


**Figure 10:** The Thermogram of Hydrolysed-torrefied Wood Dust Sample at 300 ℃ of Lophira alata tree


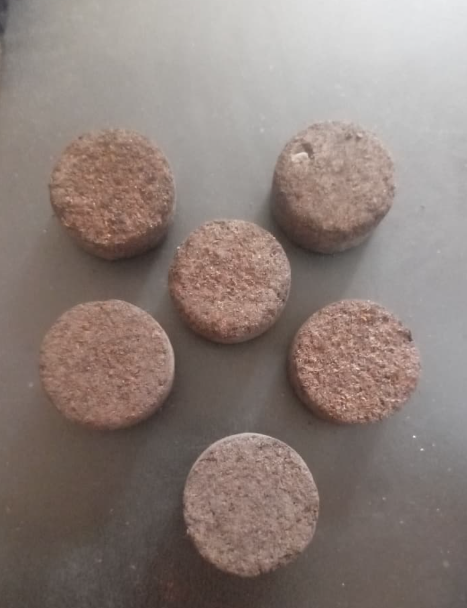


**TORRIFIED-DENSIFIED WOOD DUST**
